# Supplementary material for: Association between antibiotics and asthma risk among adults aged over 40 years: a nationally representative retrospective cohort study
Source: PubMed Central journal article supplement — BMJ Open Respir Res. 2023 Nov 1;10(1):e001643. doi: 10.1136/bmjresp-2023-001643 (PMC10649713; doi:10.1136/bmjresp-2023-001643), 2023-11-01
Supplement: bmjresp-2023-001643supp001.pdf [file bmjresp-2023-001643supp001.pdf]

## Supplementary Material

**Association between antibiotics and asthma risk among adults aged over 40: a nationally representative retrospective cohort study**

**Supplementary Figure 1. Directed acyclic graph of the relation between antibiotics, asthma, and all covariates.**

**Supplementary Table 1. Examples of antibiotics for each class based on the World Health Organization Anatomical Therapeutic Chemical (WHO ATC) guidelines.**

**Supplementary Table 2. Representative sources of infection according to the ICD-10 codes, mainly categorized by systems.**

**Supplementary Table 3. Stratified analysis of risk for asthma according to cumulative days of antibiotics prescribed.**

**Supplementary Table 4. Risk for asthma according to cumulative days of antibiotics prescribed stratified with sex.**

**Supplementary Table 5. Risk by follow-up period of asthma incidence according to cumulative days antibiotics prescribed.**

**Supplementary Table 6. Risk of according to a single specific class of antibiotics compared to antibiotics non-user group.**

**Supplementary Figure 1. Directed acyclic graph of the relation between antibiotics, asthma, and all covariates.**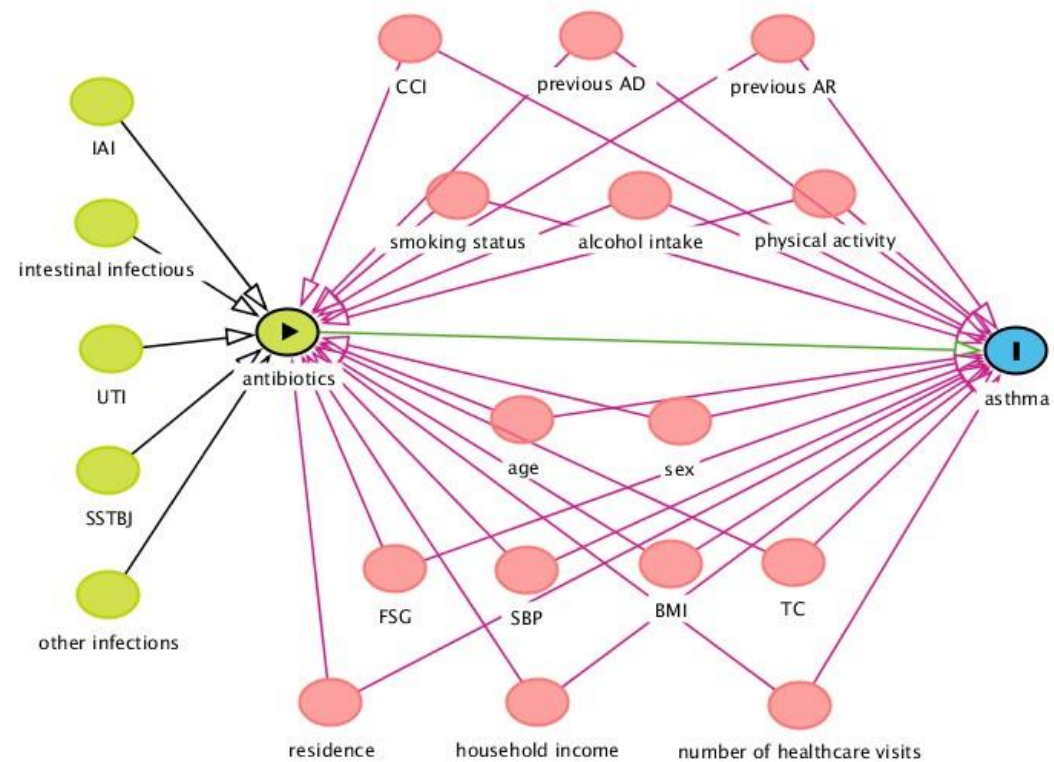

Abbreviation: IAI, intra-abdominal infections; UTI, urinary tract infections; SSTBJ, skin, soft tissue, bone, and joint infections; CCI, Charlson comorbidity index; Previous AD, previous atopic dermatitis; Previous AR, previous allergic rhinitis; FSG, fasting serum glucose; SBP, systolic blood pressure; BMI, body mass index; TC, total cholesterol;

**Supplementary Table 1. Examples of antibiotics for each class based on the World Health Organization Anatomical Therapeutic Chemical (WHO ATC) guidelines.**

| <b>Antibiotics class</b> | <b>Types of antibiotics for each class</b>                                                                                                                                                                           |
|--------------------------|----------------------------------------------------------------------------------------------------------------------------------------------------------------------------------------------------------------------|
| Tetracyclines            | doxycycline, tetracycline                                                                                                                                                                                            |
| Macrolides               | erythromycin, spiramycin, midecamycin, oleandomycin, roxithromycin, josamycin, troleandomycin, clarithromycin, azithromycin, miocamycin, rokitamycin, dirithromycin, flurithromycin, telithromycin, solithromycin    |
| Fluoroquinolones         | ofloxacin, ciprofloxacin, pefloxacin, enoxacin, temafloxacin, norfloxacin, levofloxacin, moxifloxacin, gemifloxacin, gatifloxacin, sitafloxacin                                                                      |
| Penicillins              | ampicillin, pivamicillin, carbenicillin, amoxicillin, amoxicillin and clavulanate, azlocillin, mezlocillin, mecillinam, piperacillin, ticarcillin, metampicillin, talampicillin, dicloxacillin, oxacillin            |
| Sulfonamides             | sulfaisodimidine, sulfamethizole, sulfadimidine, sulfapyridine, sulfafurazole, sulfanilamide, sulfathiazole, sulfathiourea, sulfamethoxazole and trimethoprim, sulfadiazine, sulfasalazine, sulfamoxole              |
| Lincosamides             | clindamycin, lincomycin                                                                                                                                                                                              |
| Vancomycin               | vancomycin                                                                                                                                                                                                           |
| Carbapenems              | meropenem, ertapenem                                                                                                                                                                                                 |
| Cephalosporins           | cefalexin, cefaloridine, cefalotin, cefazolin, cefatrizine, ceftazolidime, cefotaxime, cefonicid, cefotaxime, ceftazidime, ceftriaxone, cefmenoxime, cefdinir, cefteteram, cefepime, cefpirome, cefaclor, cefuroxime |
| Monobactams              | aztreonam, carumonam                                                                                                                                                                                                 |
| Linezolid                | linezolid                                                                                                                                                                                                            |

**Supplementary Table 2. Representative sources of infection according to the ICD-10 codes, categorized by systems.**

| <b>Infectious diseases</b>                            | <b>ICD-10 codes</b>                              |
|-------------------------------------------------------|--------------------------------------------------|
| Intra-abdominal infections (IAI)                      |                                                  |
| Cholecystitis & Cholangitis                           | K80, K81, K83                                    |
| Appendicitis                                          | K35, K36, K37                                    |
| Diverticulitis                                        | K57                                              |
| Peritonitis                                           | K65                                              |
| Pancreatitis                                          | K85                                              |
| Urinary tract infections (UTI)                        |                                                  |
| Cystitis                                              | N30                                              |
| Acute pyelonephritis                                  | N10                                              |
| Urethritis                                            | N34, N37                                         |
| Intestinal infectious diseases                        | A00, A01, A02, A03, A04, A05, A06, A07, A08, A09 |
| Skin, soft tissue, bone, and joint infections (SSTBJ) |                                                  |
| Cellulitis                                            | L03                                              |
| Erysipelas                                            | A46                                              |
| Impetigo                                              | L01                                              |
| Folliculitis                                          | L66.2, L66.4                                     |
| Furuncle & Carbuncle                                  | L02                                              |
| Osteomyelitis                                         | M86                                              |
| Synovitis                                             | M65, M67, M68, M70                               |
| Others                                                |                                                  |
| Acute/chronic otitis media                            | H65, H66                                         |
| Sepsis                                                | A40, A41                                         |
| Central nervous system infection                      | A81, A89                                         |

**Supplementary Table 3. Stratified analysis of risk for asthma according to cumulative days of antibiotics prescribed.**

| aHR (95% CI)                      | Total   | Events | Cumulative days of antibiotics prescribed for 5 years before the index date |                     |                     |                     |                     | P for trend | P for interaction |
|-----------------------------------|---------|--------|-----------------------------------------------------------------------------|---------------------|---------------------|---------------------|---------------------|-------------|-------------------|
|                                   |         |        | None                                                                        | 1-14 days           | 15-30 days          | 31-90 days          | ≥91days             |             |                   |
| <b>Age</b>                        |         |        |                                                                             |                     |                     |                     |                     |             | <0.001            |
| 40-49 years                       | 81,834  | 11,098 | 1.00<br>(ref)                                                               | 1.32<br>(1.24-1.41) | 1.49<br>(1.39-1.60) | 1.72<br>(1.59-1.86) | 1.70<br>(1.48-1.96) | <0.001      |                   |
| 50-59 years                       | 92,883  | 16,202 | 1.00<br>(ref)                                                               | 1.23<br>(1.17-1.30) | 1.46<br>(1.38-1.55) | 1.64<br>(1.54-1.75) | 1.71<br>(1.54-1.91) | <0.001      |                   |
| ≥60 years                         | 74,244  | 15,152 | 1.00<br>(ref)                                                               | 1.25<br>(1.17-1.32) | 1.42<br>(1.33-1.51) | 1.59<br>(1.49-1.70) | 1.79<br>(1.62-2.00) | <0.001      |                   |
| <b>Sex</b>                        |         |        |                                                                             |                     |                     |                     |                     |             | <0.001            |
| Men                               | 141,223 | 20,508 | 1.00<br>(ref)                                                               | 1.28<br>(1.22-1.34) | 1.49<br>(1.42-1.57) | 1.72<br>(1.63-1.82) | 1.84<br>(1.69-2.02) | <0.001      |                   |
| Women                             | 107,738 | 21,944 | 1.00<br>(ref)                                                               | 1.26<br>(1.19-1.32) | 1.45<br>(1.37-1.53) | 1.62<br>(1.53-1.72) | 1.77<br>(1.61-1.95) | <0.001      |                   |
| <b>Residence</b>                  |         |        |                                                                             |                     |                     |                     |                     |             | 0.061             |
| Capital                           | 41,843  | 6,888  | 1.00<br>(ref)                                                               | 1.34<br>(1.23-1.46) | 1.62<br>(1.47-1.77) | 1.78<br>(1.61-1.97) | 1.95<br>(1.66-2.29) | <0.001      |                   |
| Metropolitan                      | 112,290 | 18,585 | 1.00<br>(ref)                                                               | 1.27<br>(1.20-1.34) | 1.46<br>(1.38-1.55) | 1.64<br>(1.54-1.74) | 1.74<br>(1.57-1.92) | <0.001      |                   |
| Rural                             | 94,828  | 16,979 | 1.00<br>(ref)                                                               | 1.26<br>(1.19-1.33) | 1.46<br>(1.38-1.55) | 1.70<br>(1.59-1.80) | 1.87<br>(1.68-2.07) | <0.001      |                   |
| <b>Body Mass Index</b>            |         |        |                                                                             |                     |                     |                     |                     |             | 0.161             |
| BMI <18.5                         | 4,988   | 740    | 1.00<br>(ref)                                                               | 1.20<br>(0.95-1.52) | 1.53<br>(1.18-1.98) | 1.56<br>(1.17-2.08) | 1.67<br>(1.01-2.77) | <0.001      |                   |
| 18.5≤ BMI <23                     | 89,596  | 14,423 | 1.00<br>(ref)                                                               | 1.31<br>(1.24-1.39) | 1.55<br>(1.46-1.65) | 1.74<br>(1.63-1.86) | 1.90<br>(1.69-2.13) | <0.001      |                   |
| 23≤ BMI <25                       | 70,262  | 11,775 | 1.00<br>(ref)                                                               | 1.29<br>(1.21-1.38) | 1.48<br>(1.38-1.59) | 1.72<br>(1.60-1.86) | 1.90<br>(1.68-2.15) | <0.001      |                   |
| 25≤ BMI                           | 84,115  | 15,514 | 1.00<br>(ref)                                                               | 1.23<br>(1.16-1.31) | 1.44<br>(1.35-1.53) | 1.62<br>(1.52-1.73) | 1.74<br>(1.57-1.94) | <0.001      |                   |
| <b>Charlson comorbidity index</b> |         |        |                                                                             |                     |                     |                     |                     |             | 0.030             |
| 0                                 | 74,640  | 8,944  | 1.00<br>(ref)                                                               | 1.22<br>(1.15-1.29) | 1.47<br>(1.37-1.57) | 1.46<br>(1.34-1.59) | 1.50<br>(1.23-1.83) | <0.001      |                   |
| 1                                 | 67,324  | 11,118 | 1.00<br>(ref)                                                               | 1.23<br>(1.15-1.31) | 1.38<br>(1.29-1.49) | 1.60<br>(1.48-1.72) | 1.59<br>(1.37-1.83) | <0.001      |                   |
| ≥2                                | 106,997 | 22,390 | 1.00                                                                        | 1.28                | 1.47                | 1.70                | 1.91                | <0.001      |                   |

|                            |         |        |               |                     |                     |                     |                     |        |        |
|----------------------------|---------|--------|---------------|---------------------|---------------------|---------------------|---------------------|--------|--------|
|                            |         |        | (ref)         | (1.21-1.36)         | (1.38-1.56)         | (1.60-1.81)         | (1.75-2.08)         |        |        |
| Previous atopic dermatitis |         |        |               |                     |                     |                     |                     |        | 0.024  |
| No                         | 240,200 | 40,593 | 1.00<br>(ref) | 1.28<br>(1.24-1.33) | 1.50<br>(1.44-1.55) | 1.70<br>(1.64-1.77) | 1.84<br>(1.72-1.97) | <0.001 |        |
| Yes                        | 8,761   | 1,859  | 1.00<br>(ref) | 1.12<br>(0.92-1.36) | 1.28<br>(1.05-1.57) | 1.37<br>(1.12-1.68) | 1.62<br>(1.22-2.13) | <0.001 |        |
| Previous allergic rhinitis |         |        |               |                     |                     |                     |                     |        | <0.001 |
| No                         | 108,289 | 12,258 | 1.00<br>(ref) | 1.38<br>(1.31-1.46) | 1.66<br>(1.56-1.76) | 1.88<br>(1.75-2.01) | 2.06<br>(1.77-2.41) | <0.001 |        |
| Yes                        | 140,672 | 30,194 | 1.00<br>(ref) | 1.17<br>(1.11-1.22) | 1.35<br>(1.28-1.41) | 1.54<br>(1.46-1.62) | 1.67<br>(1.55-1.80) | <0.001 |        |

The aHRs were calculated by Cox proportional hazards regression after adjustments for multivariate variables. Stratified analysis was adjusted for age, sex, residence, body mass index, Charlson comorbidity index, the number of healthcare visits, previous atopic dermatitis, and previous allergic rhinitis.

aHR indicates adjusted hazard ratio; CI, confidence interval; and ref, reference.

**Supplementary Table 4. Risk for asthma according to cumulative days of antibiotics prescribed stratified with sex.**

|                           | Cumulative days of antibiotics prescribed for 5 years before the index date |                  |                  |                  |                  |                    |            |                  |                  |                  |                  |                    |
|---------------------------|-----------------------------------------------------------------------------|------------------|------------------|------------------|------------------|--------------------|------------|------------------|------------------|------------------|------------------|--------------------|
|                           | Men                                                                         |                  |                  |                  |                  |                    | Women      |                  |                  |                  |                  |                    |
|                           | None                                                                        | 1-14 days        | 15-30 days       | 31-90 days       | ≥91 days         | <i>P</i> for trend | None       | 1-14 days        | 15-30 days       | 31-90 days       | ≥91 days         | <i>P</i> for trend |
| Number of participants, n | 24,674                                                                      | 65,154           | 29,737           | 18,834           | 2,824            |                    | 13,776     | 46,914           | 26,757           | 18,418           | 1,873            |                    |
| Events, n                 | 2,173                                                                       | 8,469            | 5,098            | 4,075            | 693              |                    | 1,802      | 8,494            | 6,069            | 4,983            | 596              |                    |
| Person-years              | 292,588                                                                     | 753,904          | 333,344          | 203,770          | 29,390           |                    | 161,668    | 534,665          | 296,399          | 195,749          | 18,781           |                    |
| aHR (95% CI)              |                                                                             |                  |                  |                  |                  |                    |            |                  |                  |                  |                  |                    |
| Model 1 <sup>a</sup>      | 1.00 (ref)                                                                  | 1.28 (1.22-1.34) | 1.49 (1.42-1.57) | 1.72 (1.63-1.82) | 1.84 (1.69-2.02) | <0.001             | 1.00 (ref) | 1.26 (1.19-1.32) | 1.45 (1.37-1.53) | 1.62 (1.54-1.72) | 1.77 (1.61-1.95) | <0.001             |
| Model 2 <sup>b</sup>      |                                                                             | 1.00 (ref)       | 1.18 (1.14-1.22) | 1.36 (1.31-1.41) | 1.47 (1.35-1.59) | <0.001             |            | 1.00 (ref)       | 1.16 (1.12-1.20) | 1.30 (1.26-1.35) | 1.44 (1.32-1.57) | <0.001             |

The aHRs were calculated by Cox proportional hazards regression after adjustments for multivariate variables. Model 1 was adjusted for age, sex, residence, household income, smoking status, alcohol intake, physical activity, body mass index, total cholesterol, systolic blood pressure, fasting serum glucose, Charlson comorbidity index, the number of healthcare visits, previous atopic dermatitis, and previous allergic rhinitis. Model 2 was adjusted for the variables in Model 1 plus infectious (intra-abdominal infections, urinary tract infections, intestinal infectious diseases, skin, soft tissue, bone, and joint infections, and others).

<sup>a</sup>Antibiotics non-user group was set as a reference group.

<sup>b</sup>Antibiotics 1-14 days user group was set as a reference group.

n indicates number of people; aHR, adjusted hazard ratio; CI, confidence interval; and ref, reference.

**Supplementary Table 5. Risk by follow-up period of asthma incidence according to cumulative days antibiotics prescribed.**

|                                         | Cumulative days of antibiotics prescribed for 5 years before the index date |                  |                  |                  |                  | P for trend |
|-----------------------------------------|-----------------------------------------------------------------------------|------------------|------------------|------------------|------------------|-------------|
|                                         | None                                                                        | 1-14 days        | 15-30 days       | 31-90 days       | ≥91 days         |             |
| <b>Asthma incidence for &lt;2 years</b> |                                                                             |                  |                  |                  |                  |             |
| Number of participants, n               | 897                                                                         | 3,698            | 2,442            | 2,187            | 366              |             |
| Events, n                               | 580                                                                         | 2,826            | 2,008            | 1,843            | 303              |             |
| Person-years                            | 909                                                                         | 3,670            | 2,418            | 2,169            | 362              |             |
| aHR (95% CI)                            |                                                                             |                  |                  |                  |                  |             |
| Model 1 <sup>a</sup>                    | 1.00 (ref)                                                                  | 1.09 (0.99-1.19) | 1.15 (1.04-1.26) | 1.19 (1.08-1.32) | 1.18 (1.02-1.36) | <0.001      |
| Model 2 <sup>b</sup>                    |                                                                             | 1.00 (ref)       | 1.06 (1.00-1.12) | 1.10 (1.04-1.17) | 1.09 (0.96-1.24) | 0.003       |
| <b>Asthma incidence for ≥2 years</b>    |                                                                             |                  |                  |                  |                  |             |
| Number of participants, n               | 37,553                                                                      | 108,370          | 54,052           | 35,065           | 4,331            |             |
| Events, n                               | 3,395                                                                       | 14,137           | 9,159            | 7,215            | 986              |             |
| Person-years                            | 453,346                                                                     | 1,284,898        | 627,326          | 397,350          | 47,810           |             |
| aHR (95% CI)                            |                                                                             |                  |                  |                  |                  |             |
| Model 1 <sup>a</sup>                    | 1.00 (ref)                                                                  | 1.26 (1.21-1.31) | 1.46 (1.40-1.52) | 1.62 (1.55-1.69) | 1.70 (1.58-1.84) | <0.001      |
| Model 2 <sup>b</sup>                    |                                                                             | 1.00 (ref)       | 1.16 (1.13-1.20) | 1.30 (1.26-1.34) | 1.37 (1.28-1.47) | <0.001      |

The aHRs were calculated by Cox proportional hazards regression after adjustments for multivariate variables. Model 1 was adjusted for age, sex, residence, household income, smoking status, alcohol intake, physical activity, body mass index, total cholesterol, systolic blood pressure, fasting serum glucose, Charlson comorbidity index, the number of healthcare visits, previous atopic dermatitis, and previous allergic rhinitis. Model 2 was adjusted for the variables in Model 1 plus infectious diseases (intra-abdominal infections, urinary tract infections, intestinal infectious diseases, skin, soft tissue, bone, and joint infections, and others).

<sup>a</sup>Antibiotics non-user group was set as a reference group.

<sup>b</sup>Antibiotics 1-14 days user group was set as a reference group.

n indicates number of people; aHR, adjusted hazard ratio; CI, confidence interval; and ref, reference.



**Supplementary Table 6. Risk of according to a single specific class of antibiotics compared to antibiotics non-user group.**

| Exposure variable                                         | Total  | Events | Person-years | aHR (95% CI)     |
|-----------------------------------------------------------|--------|--------|--------------|------------------|
| <b>Tetracyclines</b>                                      |        |        |              |                  |
| Antibiotic non-user                                       | 38,450 | 3,975  | 454,255      | 1.00 (ref)       |
| Only-user                                                 | 1,319  | 170    | 15,409       | 1.15 (0.98-1.34) |
| <b>Macrolides</b>                                         |        |        |              |                  |
| Antibiotic non-user                                       | 38,450 | 3,975  | 454,255      | 1.00 (ref)       |
| Only-user                                                 | 7,186  | 948    | 83,490       | 1.14 (1.07-1.23) |
| <b>Fluoroquinolones</b>                                   |        |        |              |                  |
| Antibiotic non-user                                       | 38,450 | 3,975  | 454,255      | 1.00 (ref)       |
| Only-user                                                 | 11,542 | 1,669  | 131,878      | 1.16 (1.10-1.23) |
| <b>Penicillins (including ampicillin and amoxicillin)</b> |        |        |              |                  |
| Antibiotic non-user                                       | 38,450 | 3,975  | 454,255      | 1.00 (ref)       |
| Only-user                                                 | 25,557 | 3,566  | 296,238      | 1.20 (1.15-1.26) |
| <b>Sulfonamides</b>                                       |        |        |              |                  |
| Antibiotic non-user                                       | 38,450 | 3,975  | 454,255      | 1.00 (ref)       |
| Only-user                                                 | 489    | 63     | 5,683        | 1.02 (0.79-1.30) |
| <b>Lincosamides</b>                                       |        |        |              |                  |
| Antibiotic non-user                                       | 38,450 | 3,975  | 454,255      | 1.00 (ref)       |
| Only-user                                                 | 148    | 14     | 1,765        | 0.83 (0.49-1.40) |
| <b>Cephalosporins</b>                                     |        |        |              |                  |
| Antibiotic non-user                                       | 38,450 | 3,975  | 454,255      | 1.00 (ref)       |
| Only-user                                                 | 18,457 | 2,593  | 212,682      | 1.18 (1.12-1.24) |

Model was adjusted for age, sex, residence, household income, smoking status, alcohol intake, physical activity, body mass index, total cholesterol, systolic blood pressure, fasting serum glucose, Charlson comorbidity index, the number of healthcare visits, previous atopic dermatitis, and previous allergic rhinitis.

aHR, adjusted Hazard Ratio; CI, Confidence Intervals; ref, reference.
